# Supplementary material for: Comparative Impact of Supine versus Prone Positioning on Segmental Lumbar Lordosis in Patients Undergoing ALIF followed by PSF
Source: Preprints.org preprint supplement (doi:10.20944/preprints202403.1761.v1), 2024-03-28
Supplement: Supplementary file 1 [file supplementary]

**Supplemental Figure 1**: QQ Plots Comparing ALIF Construct Types (Single Screw, Double Screw, All)
